# Supplementary material for: Azacitidine Is Synergistically Lethal with XPO1 Inhibitor Selinexor in Acute Myeloid Leukemia by Targeting XPO1/eIF4E/c-MYC Signaling
Source: MDPI journal article supplement (doi:10.3390/ijms24076816), 2023-04-06
Supplement: s1 [file s1]

## **Supplemental Figures and Tables**

# **Azacitidine is synergistically lethal with XPO1 inhibitor Selinexor in acute myeloid leukemia by Targeting XPO1/eIF4E/c-MYC Signaling**

Huideng Long<sup>1#</sup>, Yue Hou<sup>1#</sup>, Jun Li, Chunhua Song<sup>2,3</sup> and  
Zheng Ge<sup>1\*</sup>

<sup>1</sup>Department of Hematology, Zhongda Hospital, School of Medicine, Southeast University, Institute of Hematology Southeast University, Nanjing 210009, China

<sup>2</sup>Hershey Medical Center, Pennsylvania State University Medical College, Hershey, PA17033, USA

<sup>3</sup>Division of Hematology, The Ohio State University Wexner Medical Center, the James Cancer Hospital, Columbus, OH 43210, USA

These authors contributed equally to the work.

Correspondence to:

Zheng Ge, M.D., Ph.D.

Department of Hematology, Zhongda Hospital, School of Medicine, Southeast University

Institute of Hematology Southeast University

87 Dingjiaqiao Street, Nanjing 210009, China,

Telephone: +86 25-83262468; Fax: +86 25-83262471

E-mail: zhengge@seu.edu.cn

ORCID: <https://orcid.org/0000-0001-8028-1612>

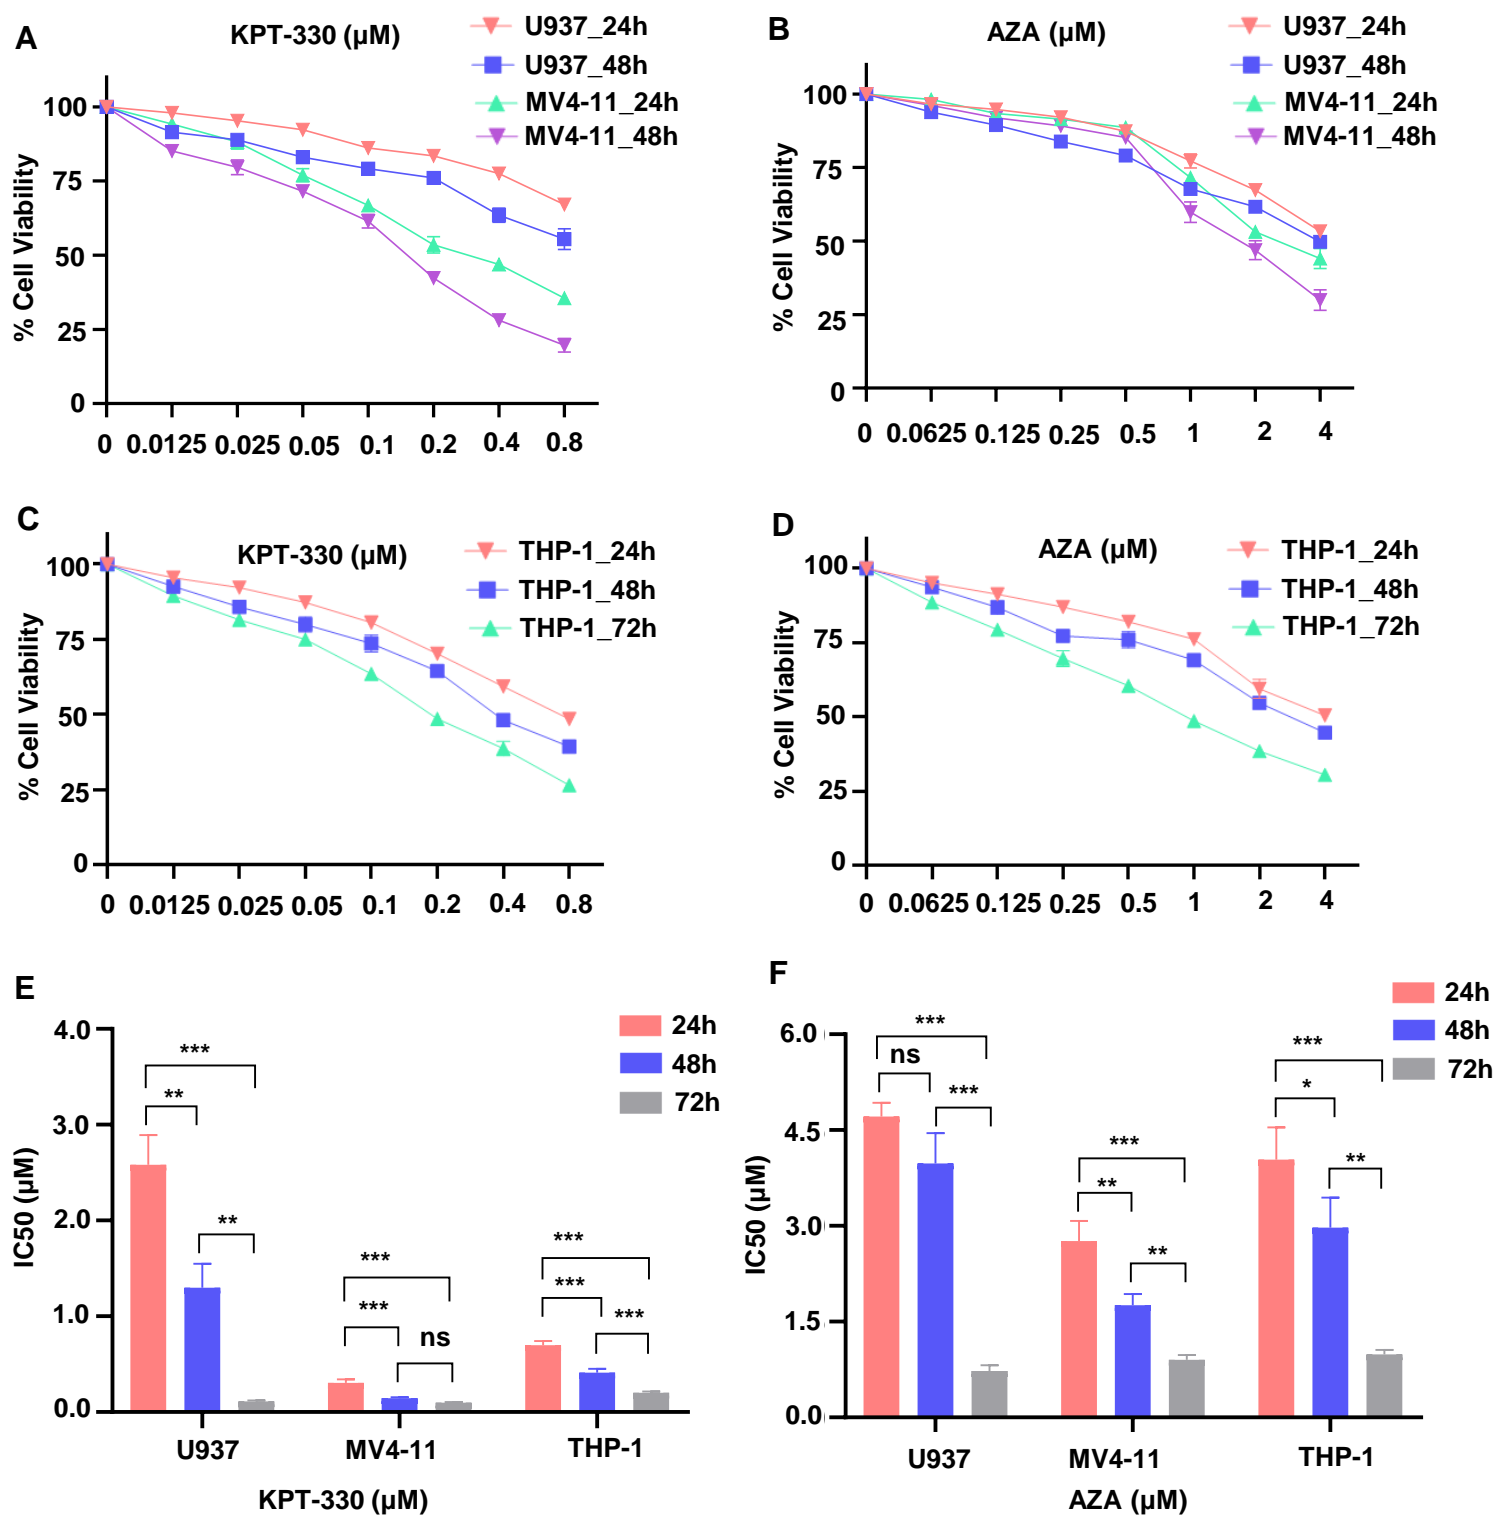

**Figure S1 Growth inhibition of KPT-330 or AZA on AML cell lines.** (A) Cell proliferation assay result (dose-dependent curve) for KPT-330 in U937 and MV4-11 for 24h and 48h. (B) Cell proliferation assay result (dose-dependent curve) for AZA in U937 and MV4-11 for 24h and 48h. (C) Cell proliferation assay result (dose-dependent curve) for KPT-330 in THP-1 for 24h, 48h and 72h. (D) Cell proliferation assay result (dose-dependent curve) for AZA in THP-1 for 24h, 48h and 72h. (E-F) IC<sub>50</sub> values of three cell lines were calculated and an IC<sub>50</sub> curve was observed based on the activity of KPT-330 or AZA. \* $p < 0.05$ , \*\* $p < 0.01$ , \*\*\* $p < 0.001$ , ns: $p > 0.05$

**A****Dose-response matrix in U937 cell (inhibition)**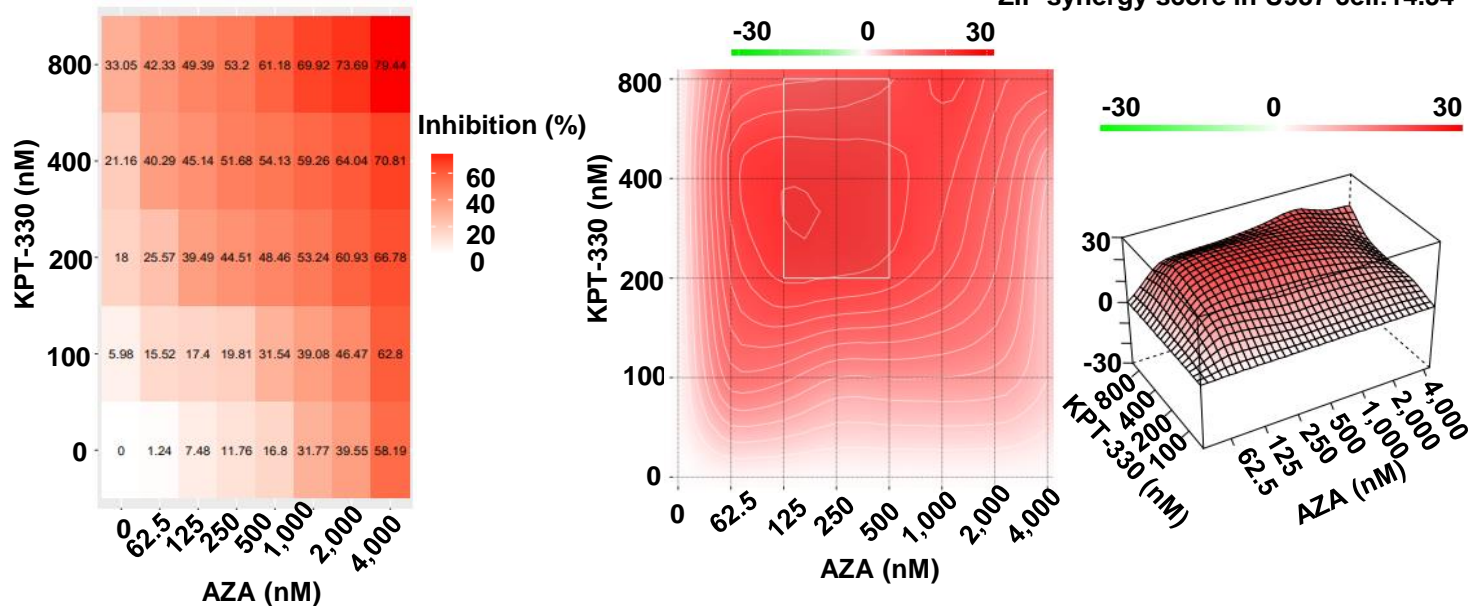**B****Dose-response matrix in MV4-11 cell (inhibition)**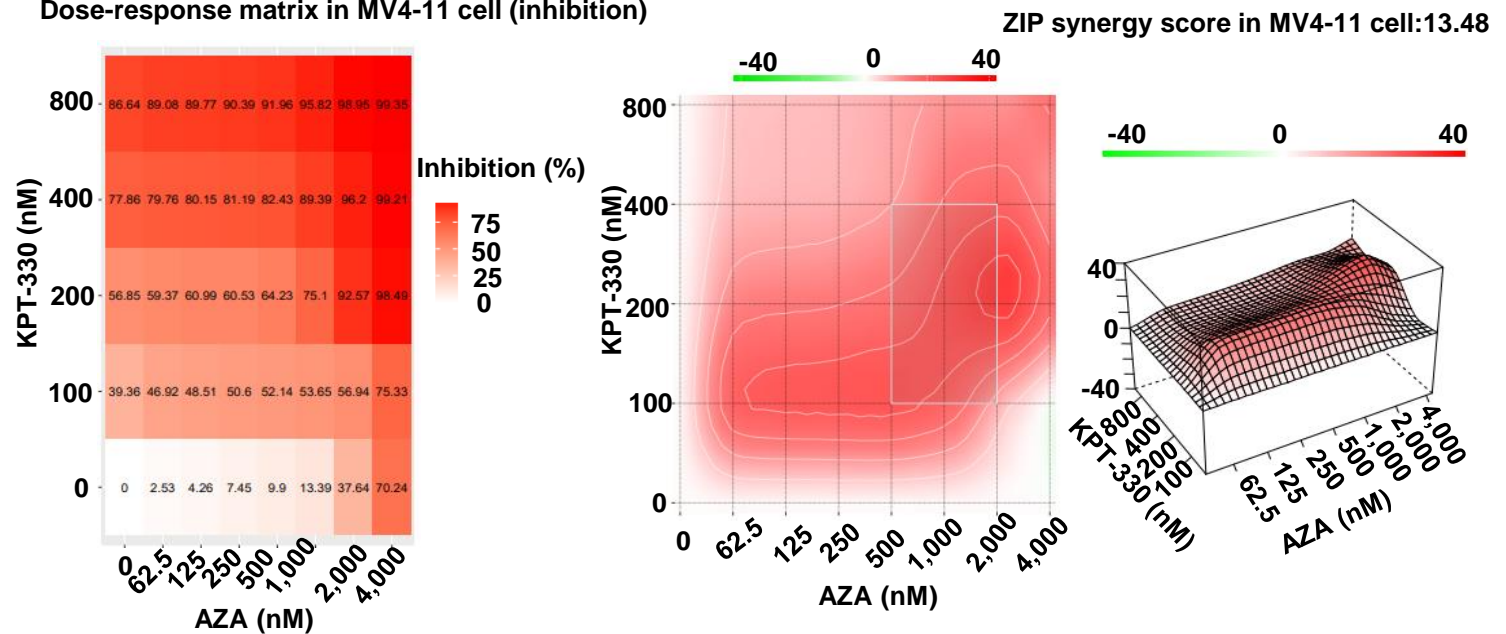**C****Dose-response matrix in THP-1 cell (inhibition)**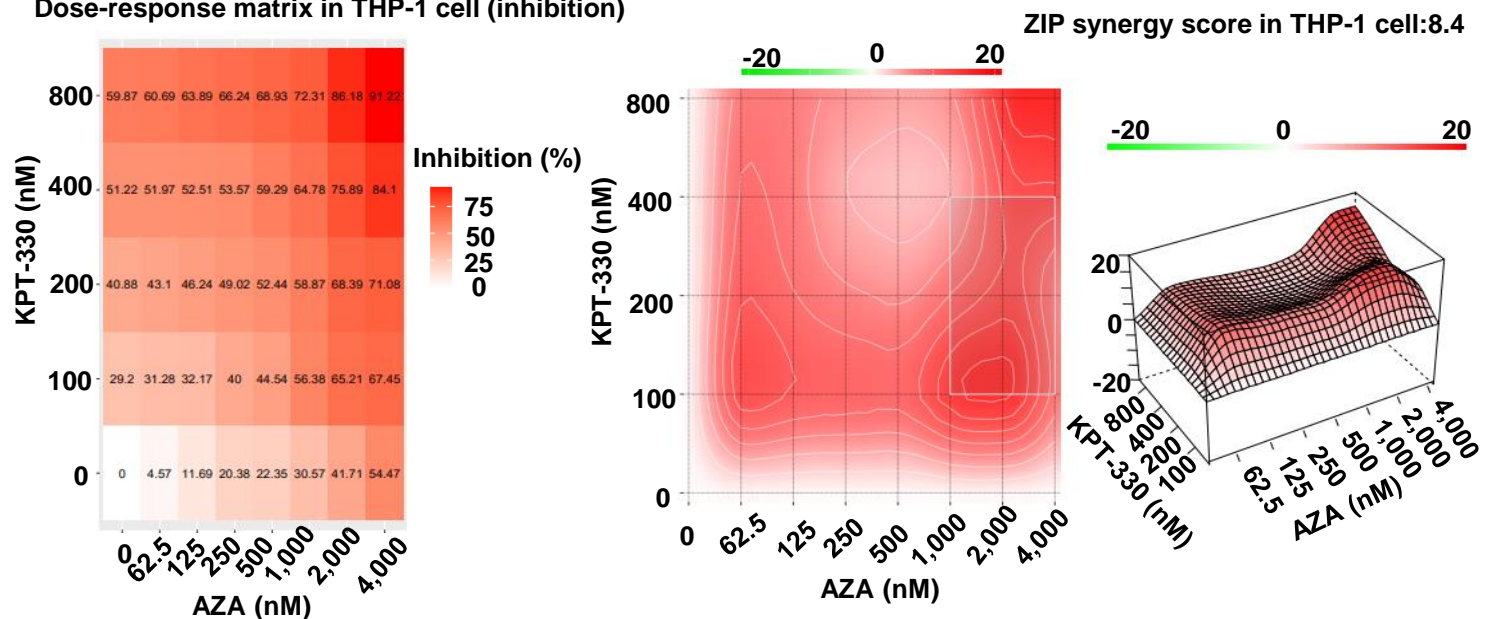

**Figure S2 Bliss analysis of Synergy of the combination on cell proliferation arrest.** (A-C) Cell viability was calculated for every dose combination of KPT-330 and AZA in U937 (A), MV4-11 (B) and THP-1 (C) cells using the SynergyFinder Web application. Synergy score: < -10, antagonistic; from -10 to 10, additive; > 10, synergistic.

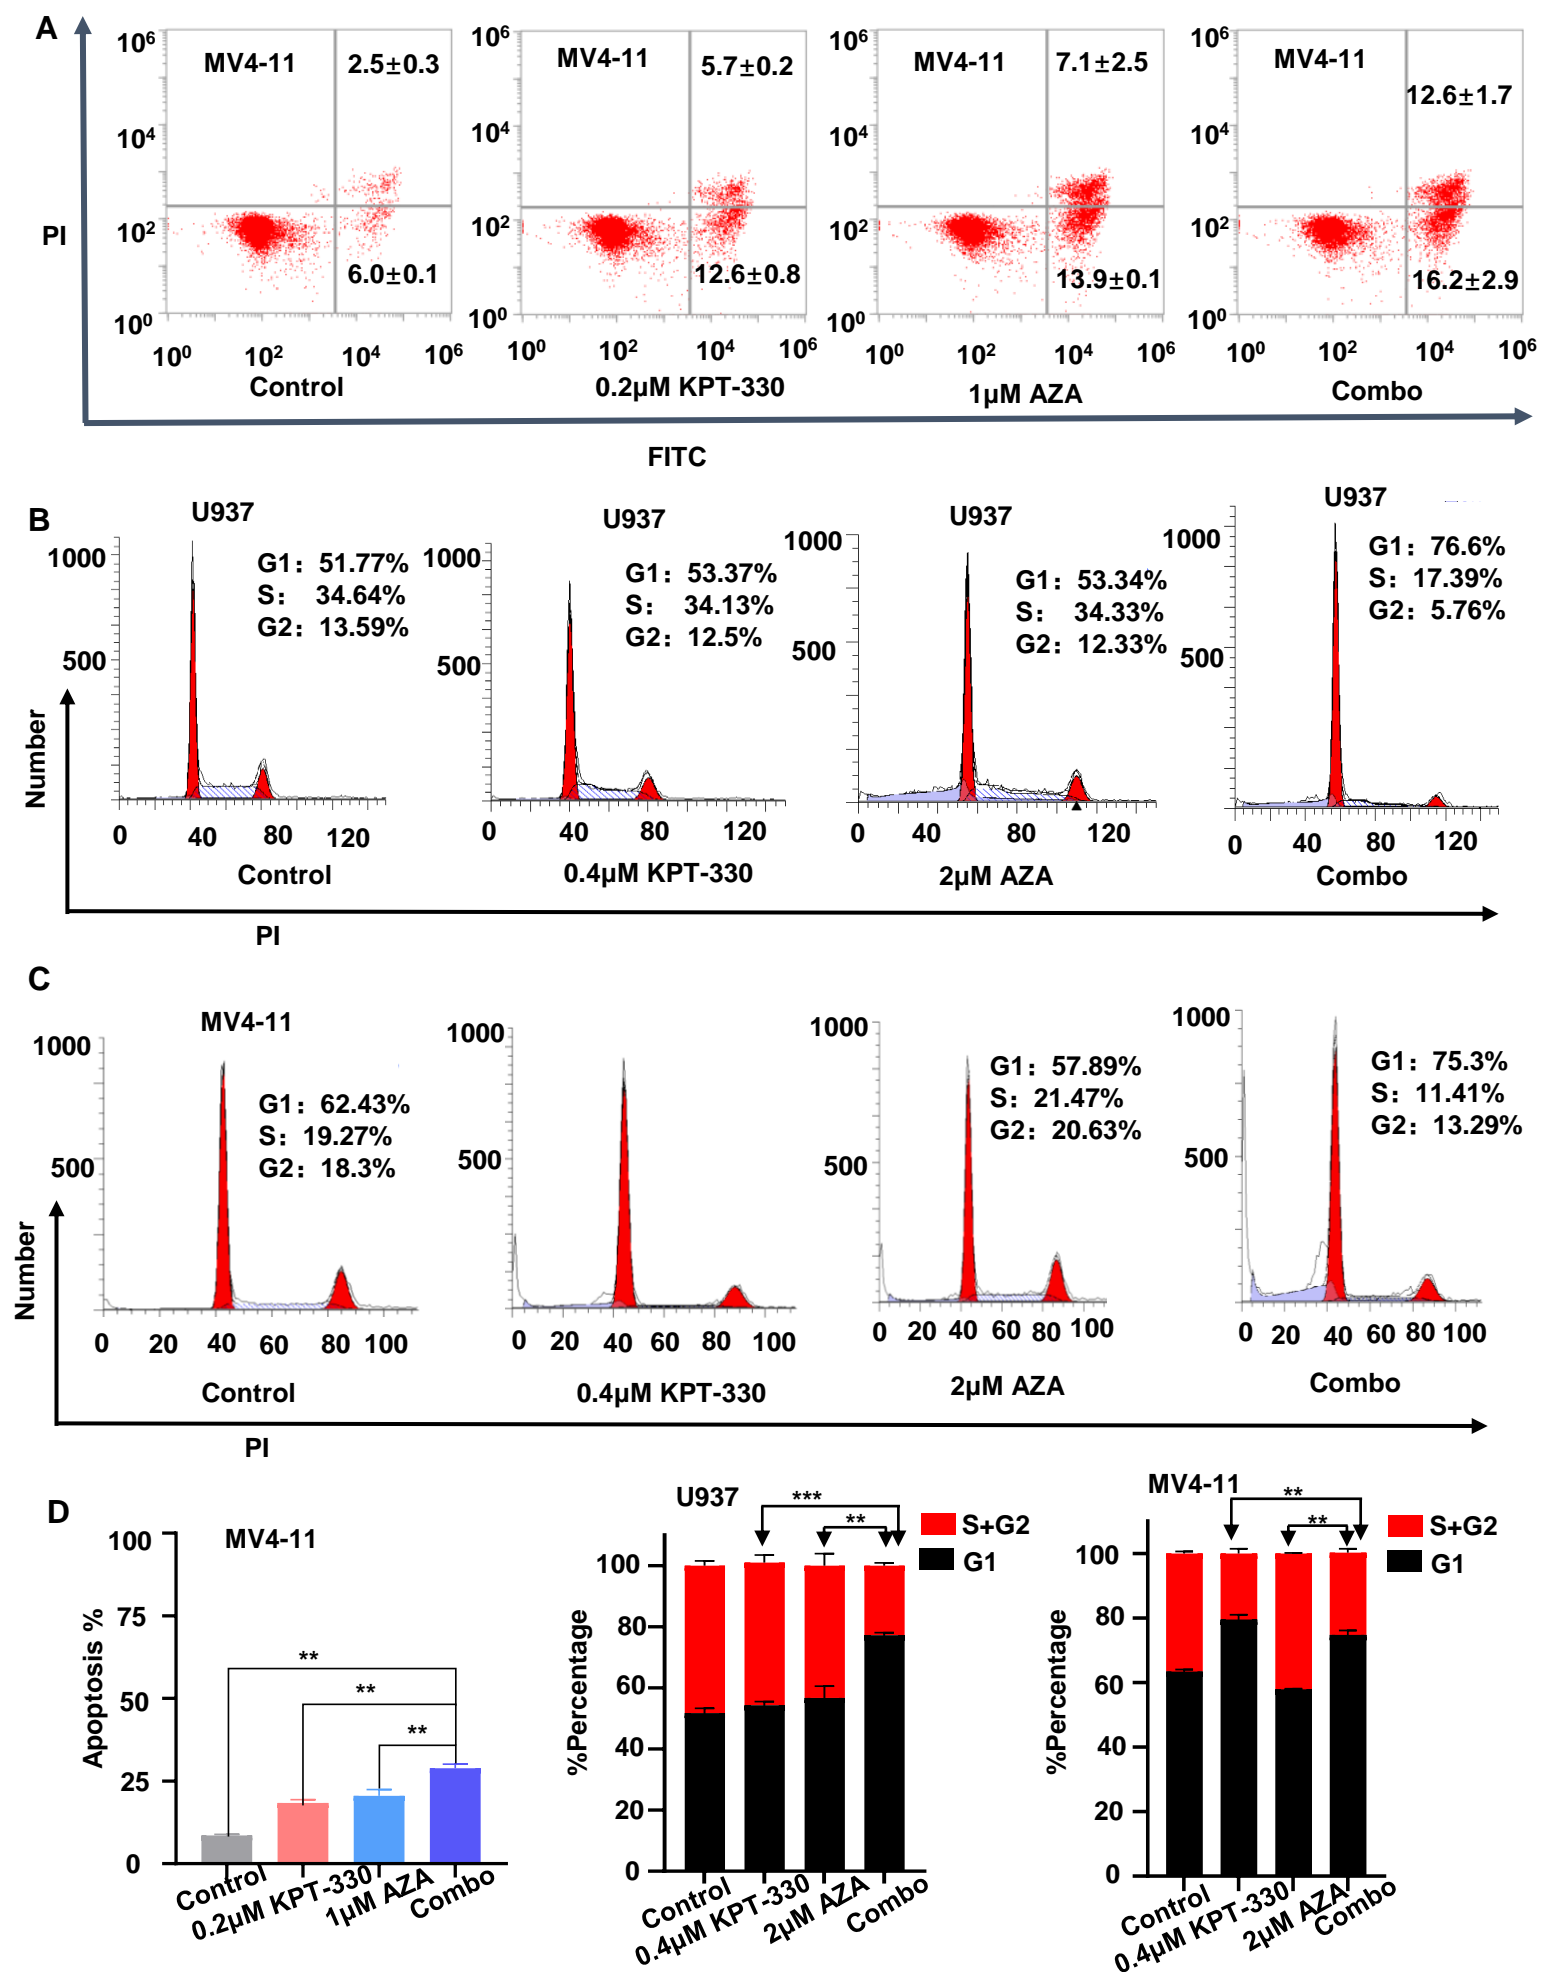

**Figure S3 Effect of KPT-330 with AZA on apoptosis and cell cycle of AML cells by flow cytometry.** (A) Effect of KPT-330 with AZA on apoptosis of MV4-11 cells. (B) Effect of KPT-330 with AZA on cell cycle of U937 cells. (C) Effect of KPT-330 with AZA on apoptosis of MV4-11 cells. (D) Quantitative bar figures in the cell lines (U937 and MV4-11). \*\* $p < 0.01$ , \*\*\* $p < 0.001$

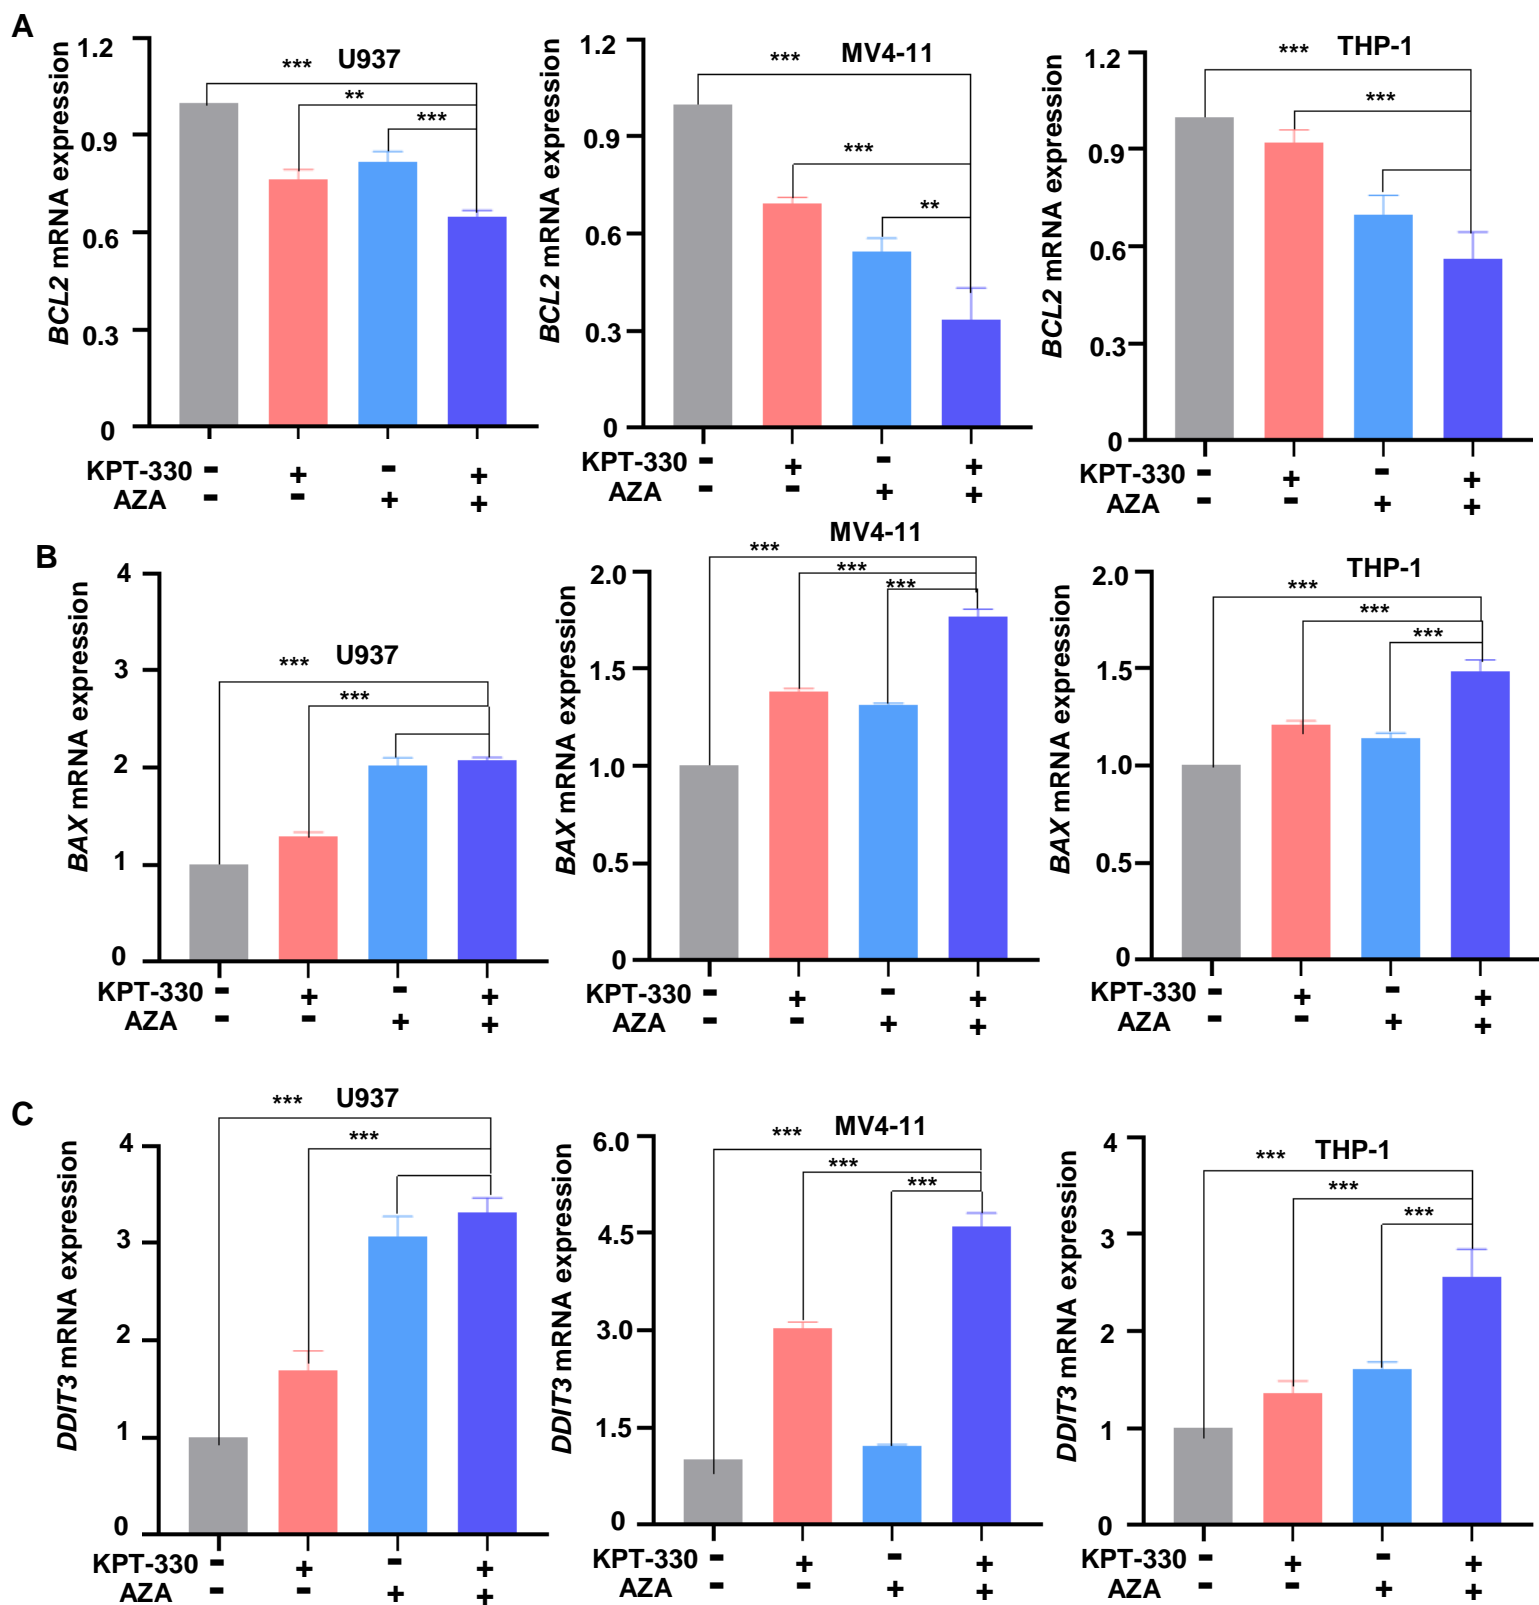

Figure S4 Change of mRNA level in the apoptosis-related genes (*BCL2*, *BAX* and *DDIT3*) upon the drug treatment in U937 (A), MV4-11 (B) and THP-1 (C) cells. \*\* $p < 0.01$ , \*\*\* $p < 0.001$

A

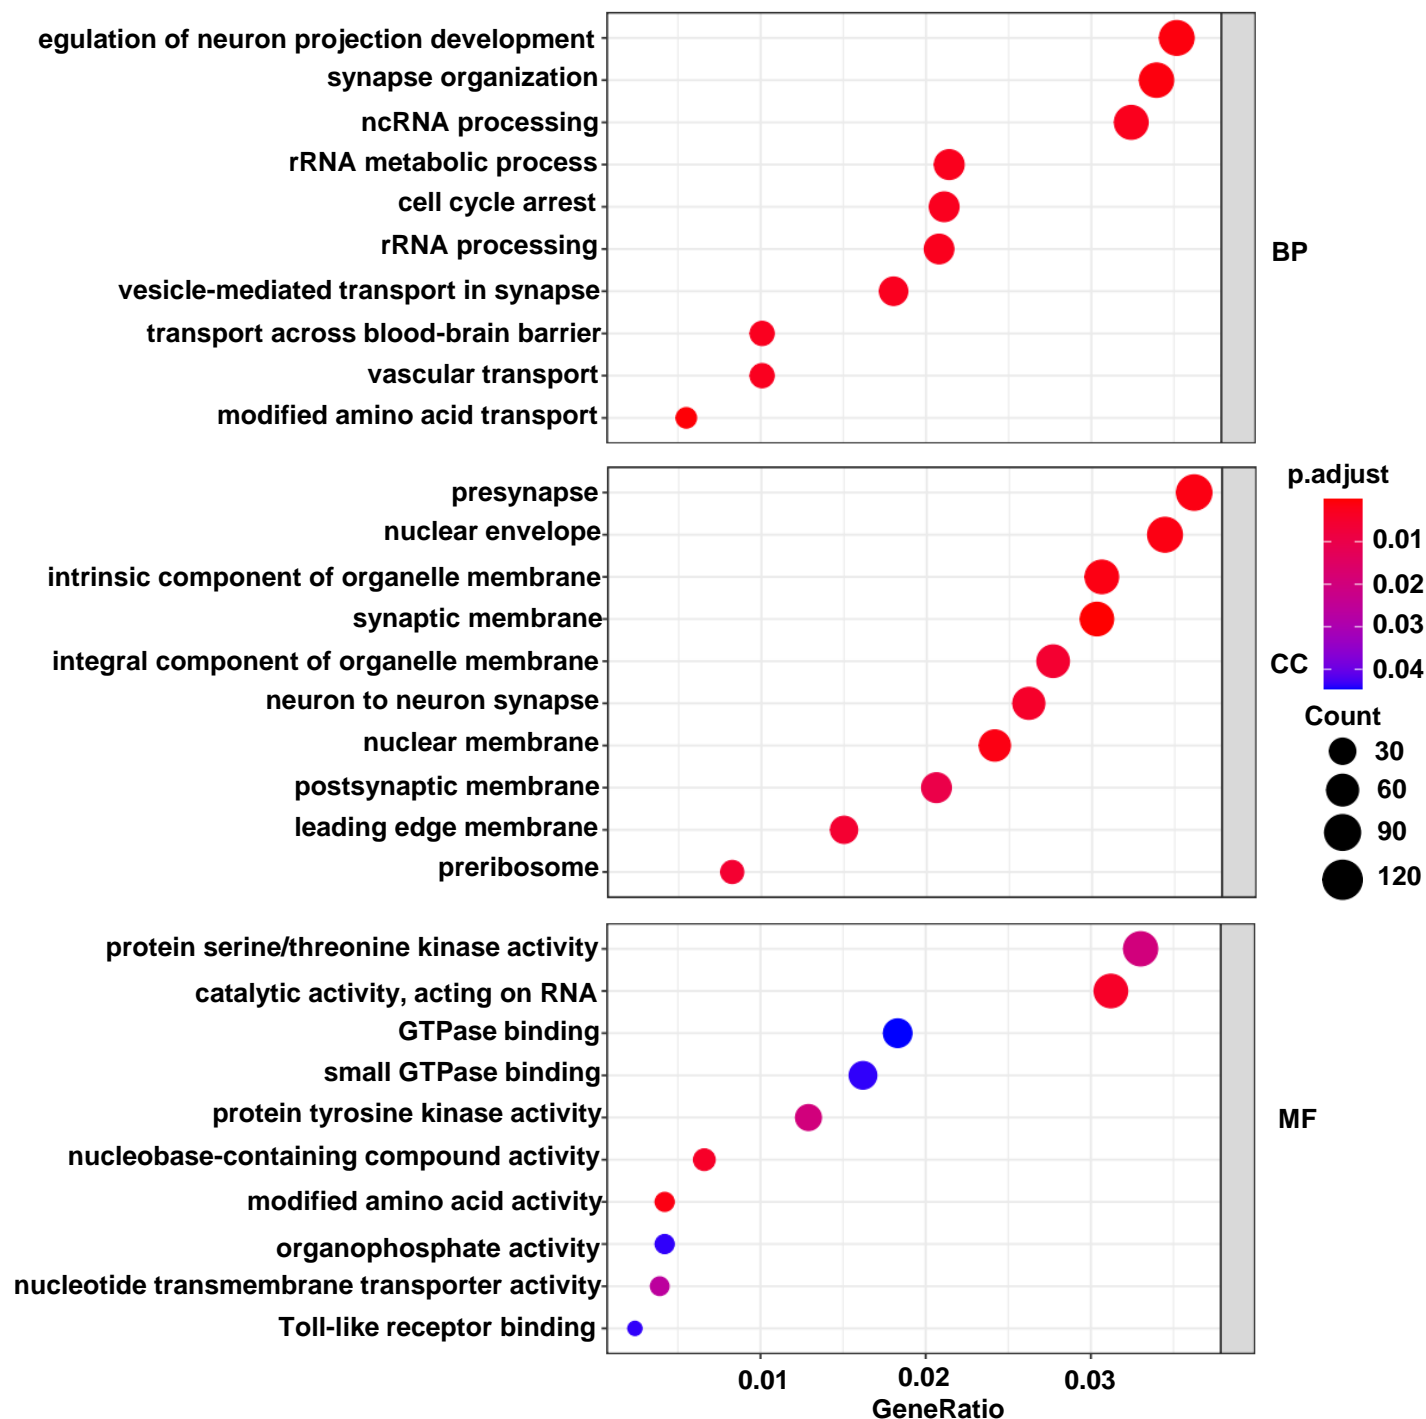

B

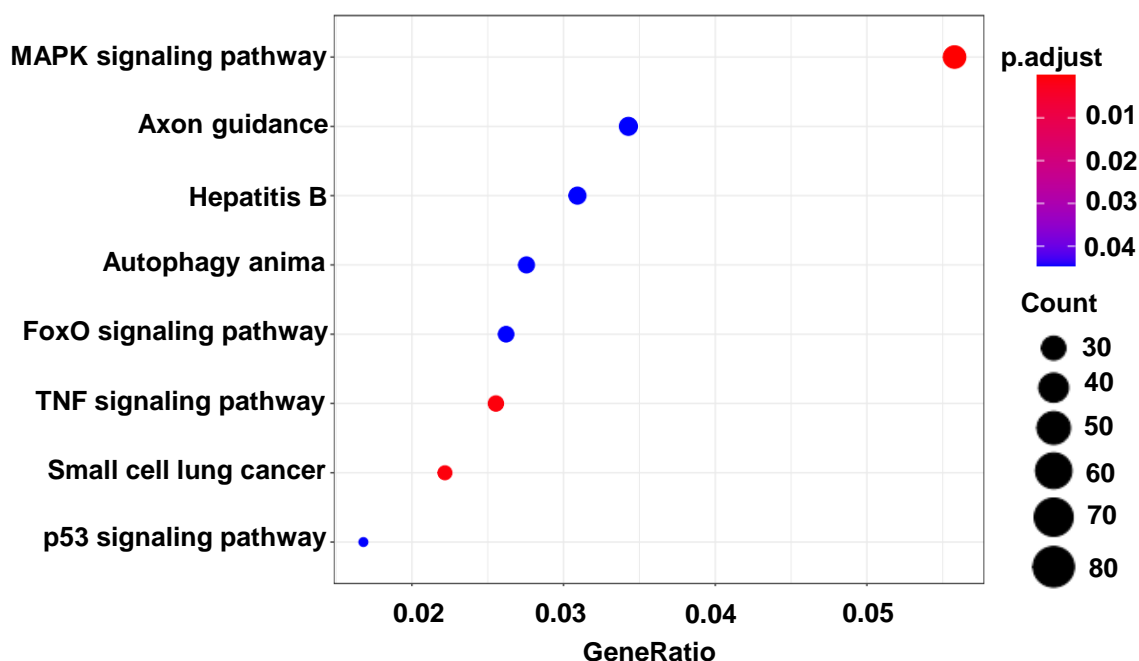

**Figure S5 Transcriptome differential gene analysis to identify key signaling pathways by bioinformatics.**  
 (A) GO analysis figure. (B) KEGG analysis figure.

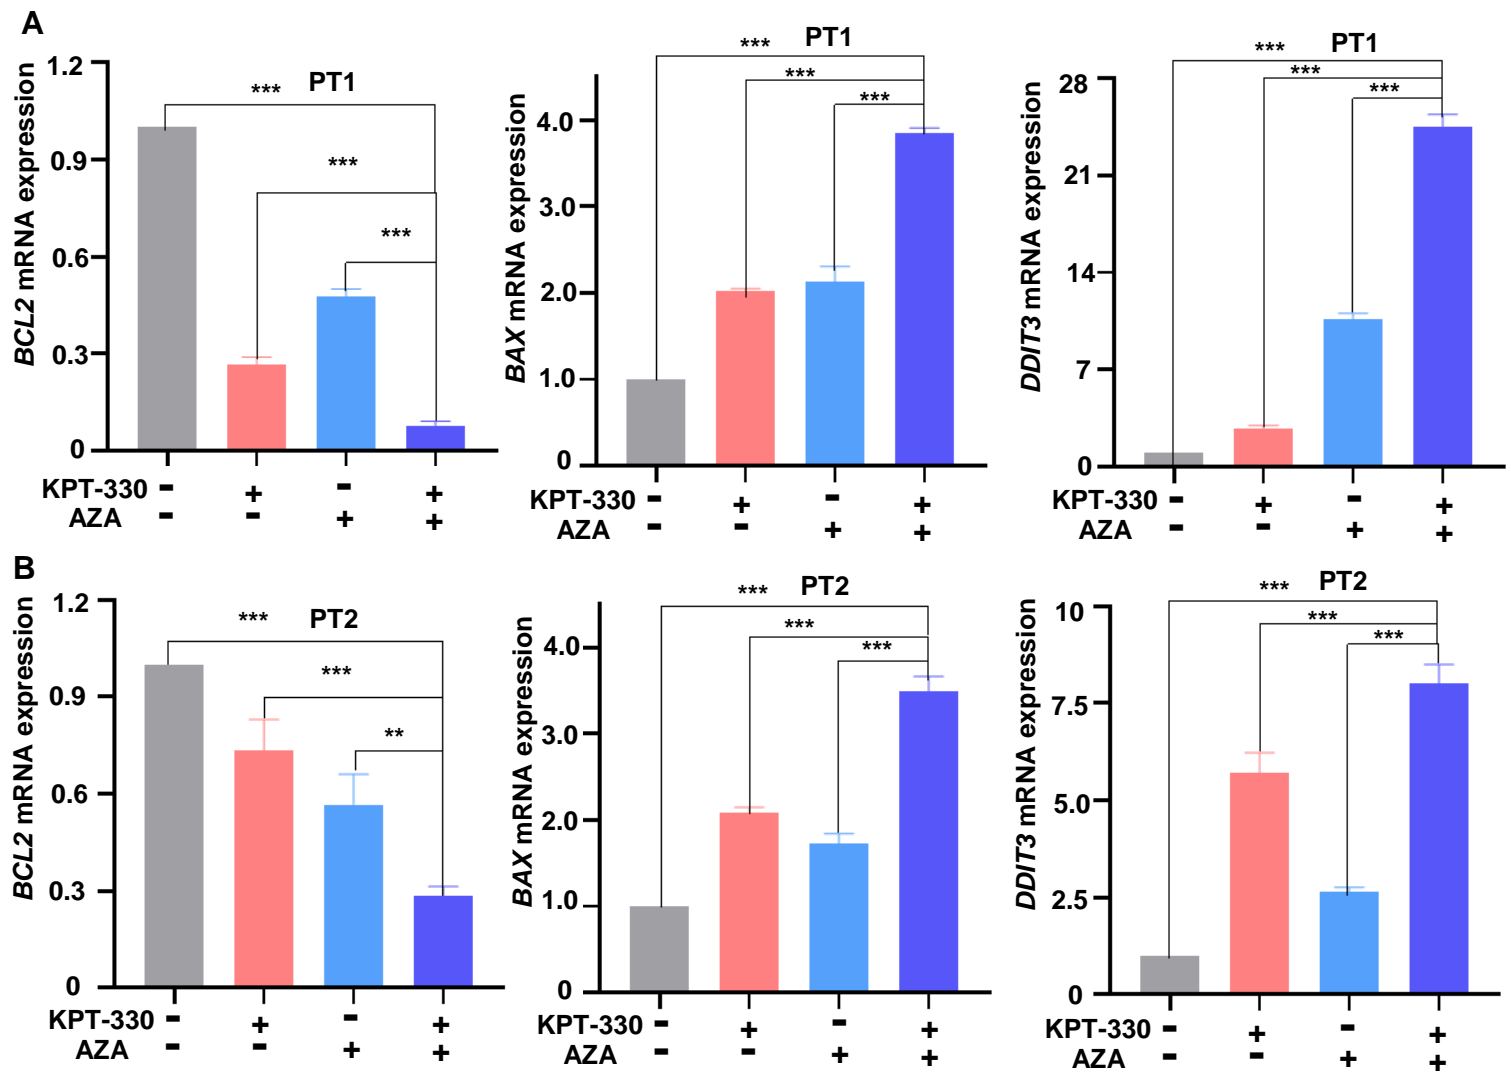

**Figure S6** Change of mRNA level in the apoptosis-related genes (*BCL2*, *BAX* and *DDIT3*) were determined after drug exposure in PT1 (A) and PT2 (B). \*\* $p < 0.01$ , \*\*\* $p < 0.001$



Combination Therapy for Leukemia

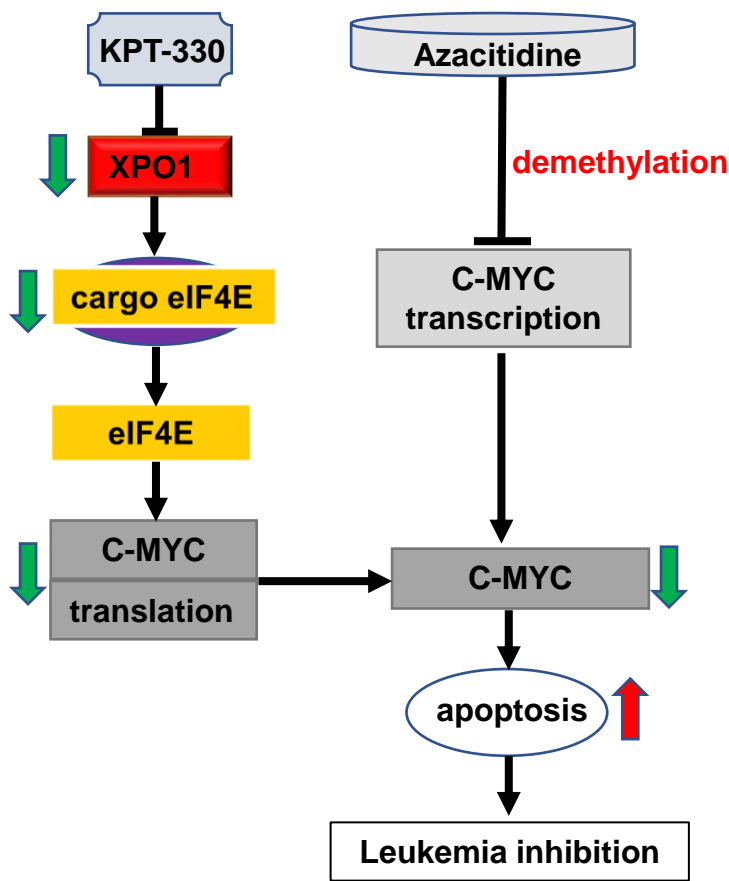

Figure S7 Anti-tumor mechanism model of the combination in AML.



**Table S1.** Correlation of characteristics of AML patients with *XPO1* and *eIF4E* expression in our center.

| Characteristics          | XPO1 expression (n=53) |                | P     | eIF4E expression (n=53) |                   | P     |
|--------------------------|------------------------|----------------|-------|-------------------------|-------------------|-------|
|                          | low (n=40)             | high (n=13)    |       | low (n=40)              | high (n=13)       |       |
| Sex, n (%)               |                        |                | 0.534 |                         |                   | 0.338 |
| Male                     | 17(42.5)               | 7(53.8)        |       | 20(50)                  | 4(30.8)           |       |
| Female                   | 23(57.5)               | 6(46.2)        |       | 20(50)                  | 9(69.2)           |       |
| FAB, n                   |                        |                | 0.597 |                         |                   | 0.256 |
| M1                       | 3                      | 1              |       | 2                       | 2                 |       |
| M2                       | 20                     | 4              |       | 20                      | 4                 |       |
| M4                       | 4                      | 2              |       | 3                       | 3                 |       |
| M5                       | 11                     | 6              |       | 13                      | 4                 |       |
| NA                       | 2                      | 0              |       | 2                       | 0                 |       |
| Age, n                   |                        |                | 0.757 |                         |                   | 0.757 |
| <60                      | 19(47.5)               | 7(53.8)        |       | 19(47.5)                | 7(53.8)           |       |
| ≥60                      | 21(52.5)               | 6(46.2)        |       | 21(52.5)                | 6(46.2)           |       |
| BM blasts, %             |                        |                | 0.385 |                         |                   | 0.620 |
| Median(range)            | 60.6(23.5-96)          | 54.4(19-89)    |       | 64.25(19-96)            | 63.2(33.2-94.9)   |       |
| WBC(×10 <sup>9</sup> /L) |                        |                | 0.301 |                         |                   | 0.385 |
| Median(range)            | 13.02(1.91-242.88)     | 4.8(0.4-73.97) |       | 18.29(0.69-94.47)       | 33.34(0.4-242.88) |       |
| Hb(g/L)                  |                        |                | 0.602 |                         |                   | 0.888 |
| Median(range)            | 79(36-112)             | 70.5(36-152)   |       | 70.5(36-152)            | 71.5(42-112)      |       |
| ELN risk, n (%)          |                        |                | 0.898 |                         |                   | 0.107 |
| Favorable                | 8(20)                  | 3(23.1)        |       | 10(25)                  | 1(7.7)            |       |
| Intermediate/Poor        | 30(75)                 | 9(69.2)        |       | 29(72.5)                | 10(76.9)          |       |
| NA                       | 2(5)                   | 1(7.7)         |       | 1(2.5)                  | 2(15.4)           |       |
| Karyotype, n (%)         |                        |                | 0.625 |                         |                   | 0.174 |
| normal                   | 22(55)                 | 9(69.2)        |       | 22(55)                  | 9(69.2)           |       |
| abnormal                 | 15(37.5)               | 3(23.1)        |       | 16(40)                  | 2(15.4)           |       |
| NA                       | 3(7.5)                 | 1(7.7)         |       | 2(5)                    | 2(15.4)           |       |
| FLT3, n (%)              |                        |                | 0.805 |                         |                   | 0.586 |
| Wt                       | 36(90)                 | 12(92.3)       |       | 37(92.5)                | 11(84.6)          |       |
| Mut                      | 4(10)                  | 1(7.7)         |       | 3(7.5)                  | 2(15.4)           |       |
| TP53, n (%)              |                        |                | 0.982 |                         |                   | 0.249 |
| Wt                       | 37(92.5)               | 12(92.3)       |       | 38(95)                  | 11(84.6)          |       |
| Mut                      | 3(7.5)                 | 1(7.7)         |       | 2(5)                    | 2(15.4)           |       |

There was no difference in clinical characteristics between the high and low-expression groups of *XPO1*. The *eIF4E* high group tended to have more *FLT3* (2/11 vs. 3/37) and *TP53* (2/11 vs. 2/38) mutations than the *eIF4E* low expression group.
